# Supplementary material
Source: PubMed Central journal article supplement (PMC9482097)
Supplement: NIHMS1834758-supplement-Supplementary_material.pdf [file NIHMS1834758-supplement-Supplementary_material.pdf]

**Supplementary material for:**

**Evaluation of the *tert*-butyl group as a probe for NMR studies of macromolecular complexes**

Rashmi Voleti<sup>1,2,3</sup>, Sofia Bali<sup>4,10</sup>, Jaime Guerrero<sup>1,10</sup>, Jared Smothers<sup>5,10</sup>, Charis Springhower<sup>1,9,10</sup>,  
Gerardo A. Acosta<sup>6,7</sup>, Kyle Brewer<sup>1,2,3</sup>, Fernando Albericio<sup>6,7,8</sup> and Josep Rizo<sup>1,2,3,\*</sup>

<sup>1</sup>Department of Biophysics, University of Texas Southwestern Medical Center, Dallas, Texas 75390, USA

<sup>2</sup>Department of Biochemistry, University of Texas Southwestern Medical Center, Dallas, Texas 75390,  
USA

<sup>3</sup>Department of Pharmacology, University of Texas Southwestern Medical Center, Dallas, Texas 75390,  
USA

<sup>4</sup>Center for Alzheimer's and Neurodegenerative Diseases, University of Texas Southwestern Medical  
Center, Dallas, Texas 75390, USA

<sup>5</sup>Department of Molecular Genetics, University of Texas Southwestern Medical Center, Dallas, Texas  
75390, USA

<sup>6</sup>CIBER-BBN, Networking Centre on Bioengineering, Biomaterials and Nanomedicine, and Department of  
Organic Chemistry, University of Barcelona, 08028 Barcelona, Spain

<sup>7</sup>Institute of Advanced Chemistry of Catalonia (IQAC-CSIC), Spanish National Research Council (CSIC),  
Jordi Girona 18-26, 08034 Barcelona, Spain

<sup>8</sup>Peptide Science Laboratory, School of Chemistry and Physics, University of KwaZulu-Natal, Durban  
4001, South Africa

<sup>9</sup>Current address: Alicat Scientific, Tucson, Arizona 85743, USA

<sup>10</sup>These authors contributed equally to this work

\*Josep Rizo: [Jose.Rizo-Rey@UTSouthwestern.edu](mailto:Jose.Rizo-Rey@UTSouthwestern.edu)

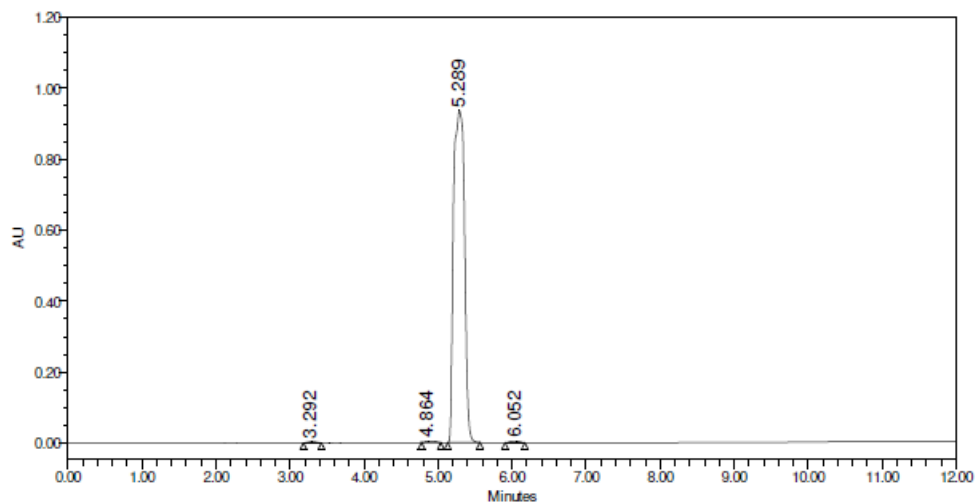

|   | RT    | Area    | % Area | Height |
|---|-------|---------|--------|--------|
| 1 | 3.292 | 28550   | 0.29   | 3332   |
| 2 | 4.864 | 35625   | 0.37   | 3584   |
| 3 | 5.289 | 9644992 | 98.96  | 935338 |
| 4 | 6.052 | 37658   | 0.39   | 3727   |

**Supplementary Figure 1.** HPLC-PDA of purified 5-(*tert*-butyldisulfanyl)-2-nitrobenzoic acid. Column: Xbridge BEH 130 C18 3,5 $\mu$ m 4,6x100mm; Eluent: water with 0,045% of TFA and ACN with 0,036% of TFA; Gradient: 40 to 100% of ACN in 8 minutes, Flow 1 mL/min. Purity 98,96 % at 220 nm. Retention time 5,289 min.

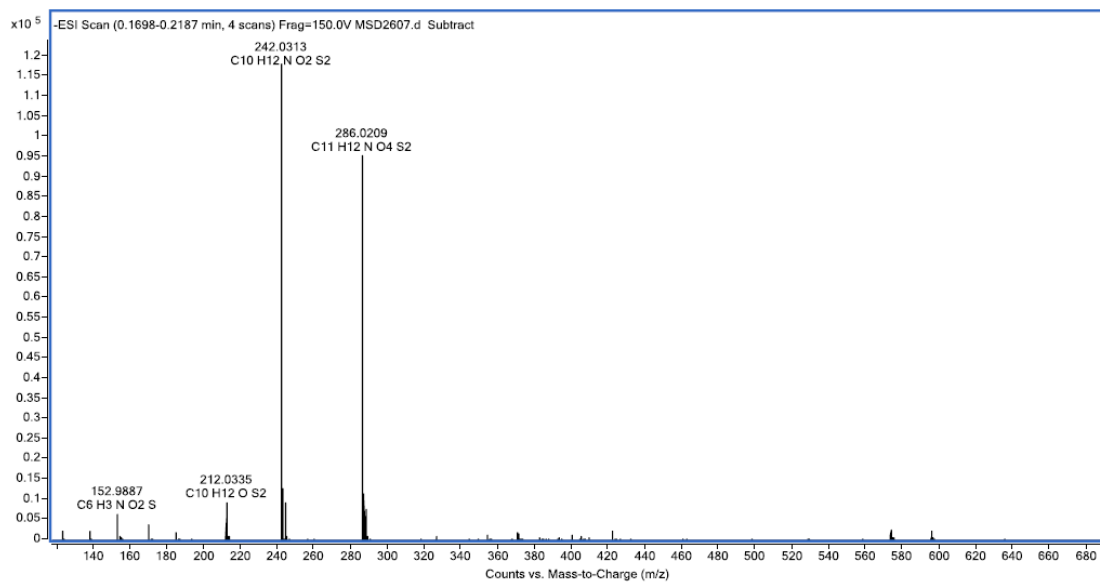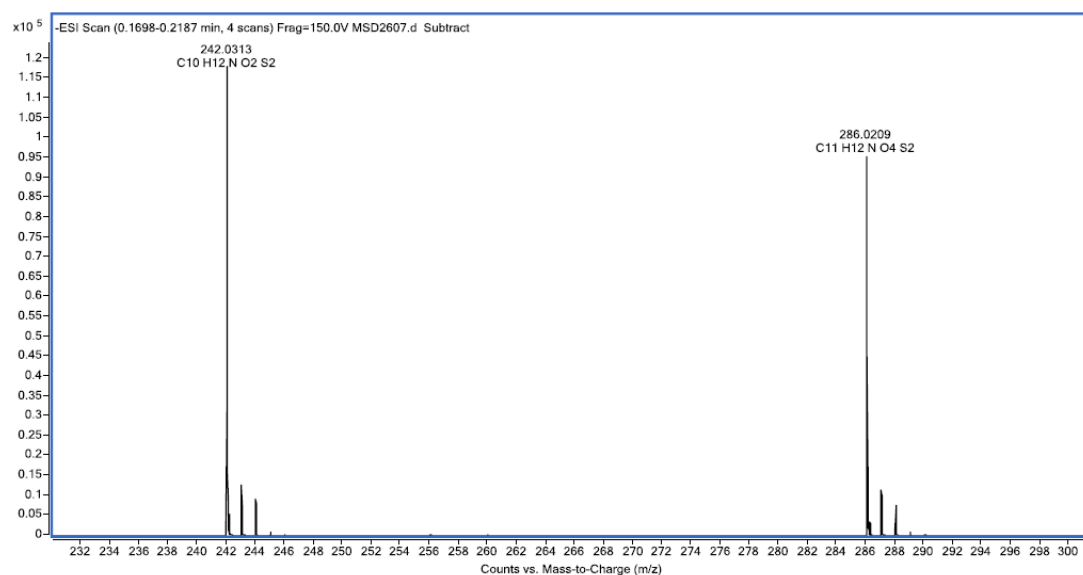

**Supplementary Figure 2.** HR-MS: HR-MS –ESI of 5-(tert-butylidisulfanyl)-2-nitrobenzoic acid. Calculated

Mass  $[M+H]^{+1} = 287,35$ ;  $[M-COOH]^{-1} = 242,33$ . Found Mass  $[M-H]^{-1} = 286,0209$  Diff. = 1.43 ppm;

$[M-COOH]^{-1} = 242,0313$  Diff = 0,81 ppm. Diff = (Calculated Mass- Found Mass)/Calculated Mass \* 10<sup>6</sup>.

1487-2018\_VNMRS500PCB\_11102018\_GA-EIItBuS-H1  
Equip: VNMRS500PCB / Num.Inv. 225266  
H1 / Solvent: dms0 / Temp: 25 C  
N.Reg: 1487/2018  
Usuari: fap / Mostra: GA-EIItBuS  
Nom: GERARDO\_ALEXIS ACOSTA CRESPO  
Data: 11/10/18 11:30:55 h./ Ope.: M.ANTONIA MOLINS

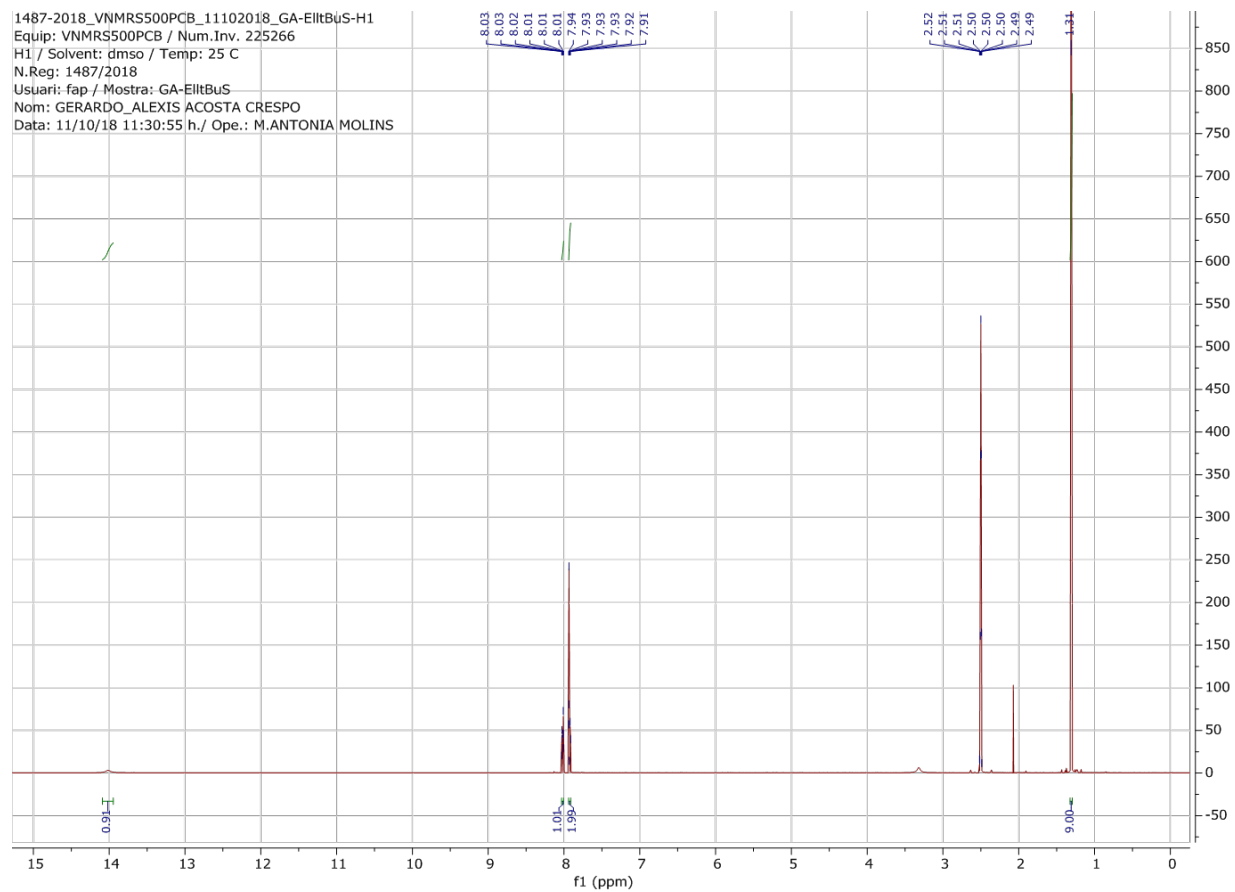

Supplementary Figure 3. <sup>1</sup>H-NMR spectrum of 5-(*tert*-butylidisulfanyl)-2-nitrobenzoic acid.

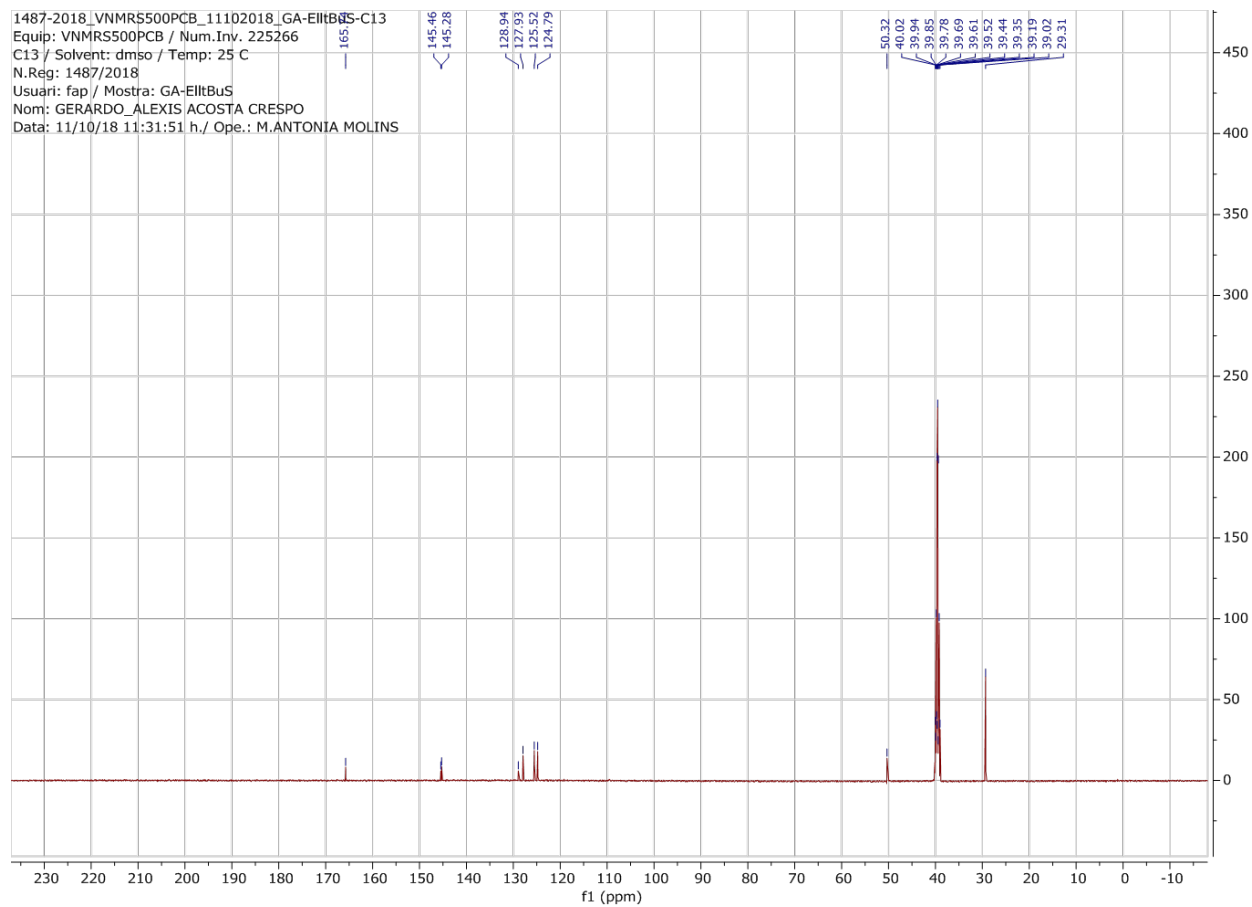

**Supplementary Figure 4.**  $^{13}\text{C}$ -NMR spectrum of 5- (*tert*-butylidisulfanyl)-2-nitrobenzoic acid.

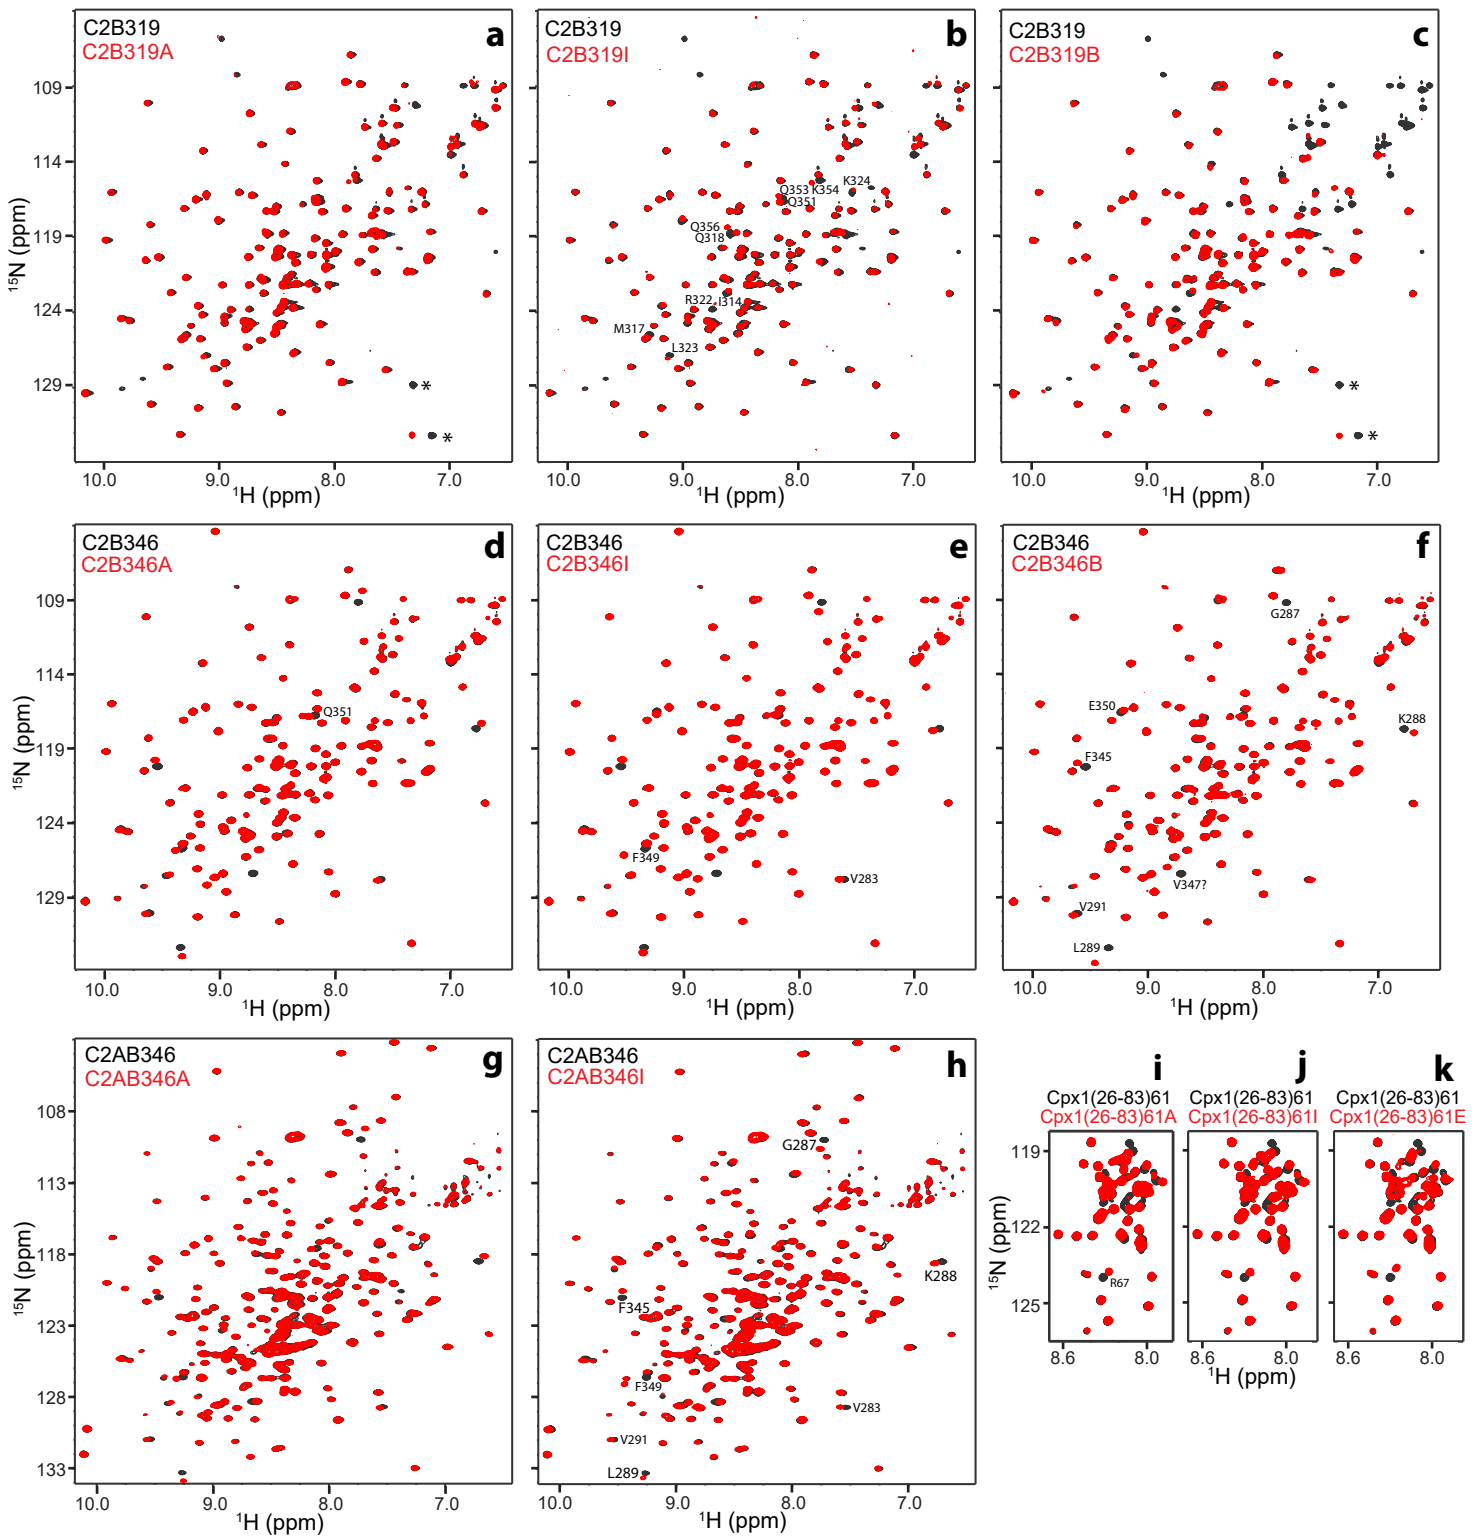

Supplementary Figure 5

**Supplementary Figure 5.**  $^1\text{H}$ - $^{15}\text{N}$  HSQC spectra illustrating cross-peak shifts caused by  $^t\text{Bu}$  tagging.  $^1\text{H}$ - $^{15}\text{N}$  HSQC spectra of Syt1 C<sub>2</sub>B domain N319C (**a-c**), Syt1 C<sub>2</sub>B domain E346C (**d-f**), Syt1 C<sub>2</sub>AB E346C (**g-h**) and Cpx1(26-83) V61c (**i-k**) before (black contours) and after (red contours) tagging with a  $^t\text{Bu}$  group via the acrylate (**a, d, g, i**), iodoacetamide (**b, e, h, j**) or BDSNB (**c, f, k**) reaction. Selected cross-peaks that shifted in the spectra of the Syt1 C<sub>2</sub>B domain or C<sub>2</sub>AB fragment mutants due to tagging with the  $^t\text{Bu}$  group using the corresponding reactions are labeled in panels (**b, f, h**), and additional cross-peaks that shifted due to tagging with other reactions are labeled in the corresponding panels. All the perturbed cross-peaks correspond to residues in close proximity to the site tagged with a  $^t\text{Bu}$  group in the three-dimensional structure of the C<sub>2</sub>B domain. For Cpx1(26-83) V61C, only one well-resolved cross-peak that shifts due to tagging (corresponding to R67) can be unambiguously assigned. The  $^1\text{H}$ - $^{15}\text{N}$  HSQC spectrum of C2B319B (red contours in panel **c**) was acquired by mistake with a TROSY-enhanced pulse sequence and hence it does not contain the cross-peaks corresponding to the Asn and Gln side chains, but the spectra is still useful to monitor shifts in the backbone NH groups. Note also that we did not acquire a  $^1\text{H}$ - $^{15}\text{N}$  HSQC spectrum from C<sub>2</sub>AB346B, but tagging of the protein with  $^t\text{Bu}$  was confirmed by the sharp resonance observed at the same chemical shift observed for the  $^t\text{Bu}$  group of C<sub>2</sub>B346B (Figure 4c, d).

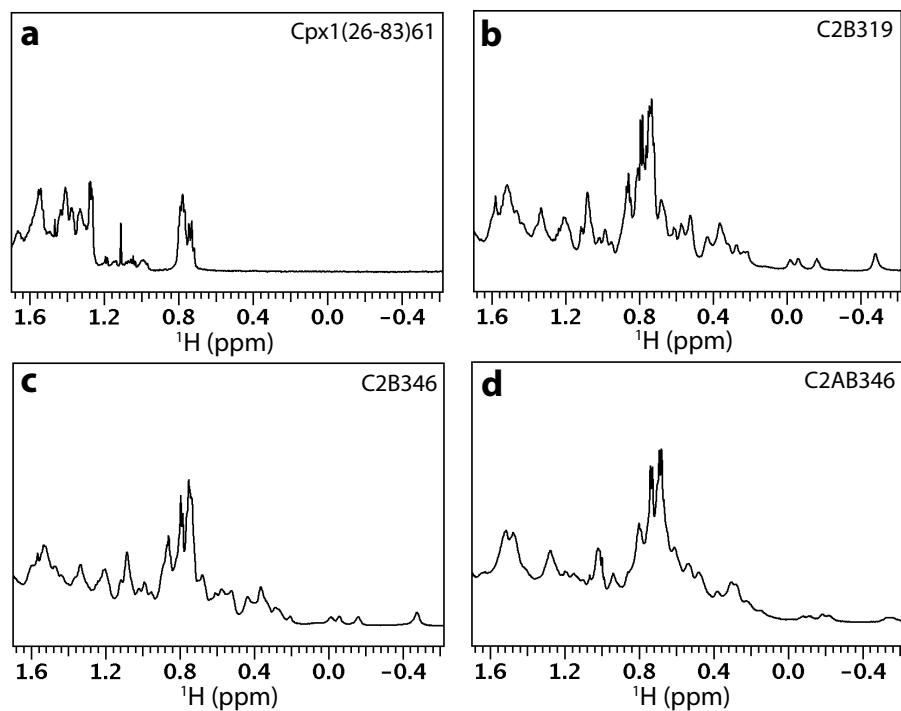

**Supplementary Figure 6.** Expansions corresponding to the methyl region of 1D <sup>1</sup>H NMR spectra of Cpx1(26-83) V61C mutant [Cpx1(26-83)61] (a), Syt1 C<sub>2</sub>B domain N319C mutant (C2B319) (b), Syt1 C<sub>2</sub>B domain E346C mutant (C2B346) (c) and Syt1 C<sub>2</sub>AB E346C mutant (C2AB346) (d).



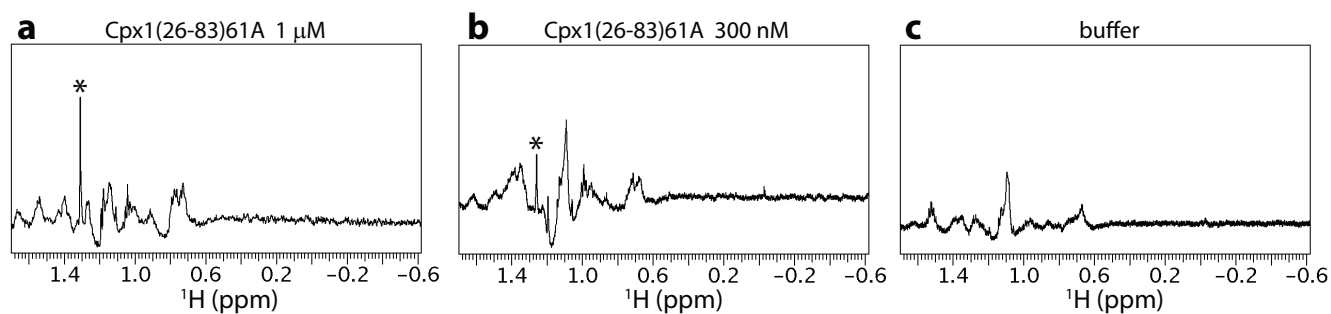

**Supplementary Figure 7.** 1D  $^1\text{H}$  NMR spectra of 1  $\mu\text{M}$  Cpx1(26-83)A (**a**), 300 nM Cpx1(26-83)A (**b**) and the buffer used to dissolve these samples (**c**), which contained 20 mM HEPES pH 7.4, 125 mM KCl and 10%  $\text{D}_2\text{O}$ . The spectra of (**a**) and (**c**) were acquired in 1 hr and were plotted at the same vertical scale. The spectrum of (**b**) was acquired in 3 hr and plotted at a vertical scale 3.3 time higher than those of (**a**, **c**).
